# Supplementary material
Source: bioRxiv or medRxiv preprint supplement (https://medrxiv.org/highwire/filestream/84094/field_highwire_adjunct_files/0/2020.06.01.20116608-1.pdf)
Supplement: Supplementary file [file 2020.06.01.20116608-1.pdf]

## **Is death from COVID-19 a multistep process?**

Neil Pearce<sup>1</sup>, Giovenale Moirano<sup>2</sup>, Milena Maule<sup>2</sup>, Manolis Kogevinas<sup>3,4</sup>, Xavier Rodo<sup>3</sup>,  
Deborah A Lawlor<sup>5,6</sup>, Jan Vandembroucke<sup>1,7,8</sup>, Christina Vandembroucke-Grauls<sup>9</sup>, Fernando P  
Polack<sup>10,11</sup>, Adnan Custovic<sup>12</sup>

- (1) London School of Hygiene and Tropical Medicine, London, UK
- (2) Unit of Cancer Epidemiology, Department of Medical Sciences, University of Turin
- (3) ISGlobal, Barcelona, Spain
- (4) IMIM (hospital del Mar Medical Research Institute), Barcelona, Spain
- (5) MRC Integrative Epidemiology Unit at the University of Bristol, Bristol, UK
- (6) Population Health, Bristol Medical School, University of Bristol, Bristol, UK
- (7) Leiden University Medical Center, The Netherlands
- (8) Aarhus University Denmark
- (9) Department of Medical Microbiology and Infection Prevention, Amsterdam UMC, The Netherlands
- (10) Fundacion INFANT, Buenos Aires, Argentina
- (11) Department of Pediatrics, Vanderbilt University, Nashville, TN
- (12) National Heart & Lung Institute, Imperial College London, United Kingdom

## **Supplementary Appendix**

May 2020

## Country-specific findings

**Figure S1. China**

*Total (males and females combined) for CFR*

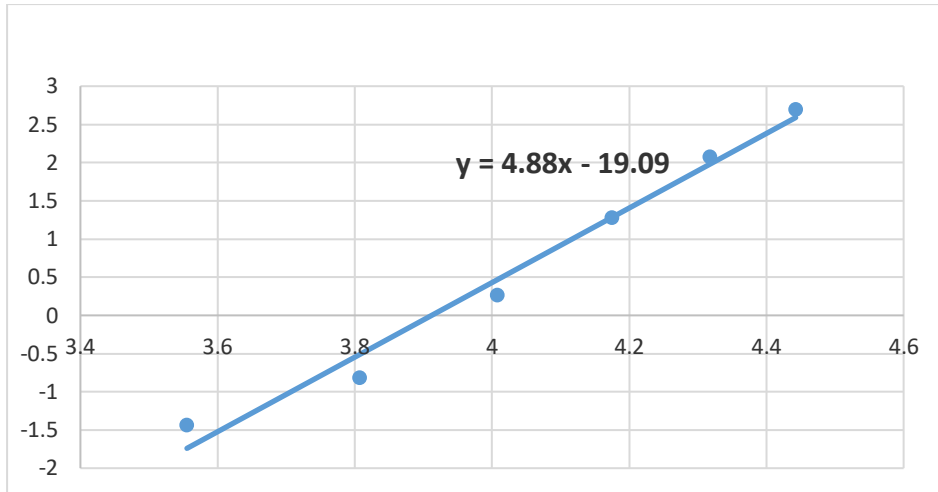

**Figure S2. South Korea**

*Total (males and females combined) for CFR*

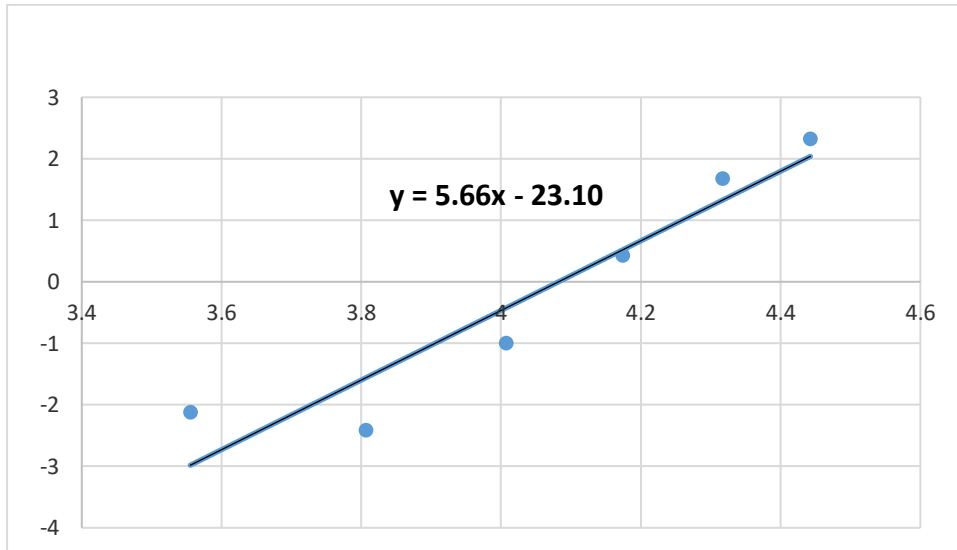

### Figure S3. Italy

Total (males and females combined) for CFR

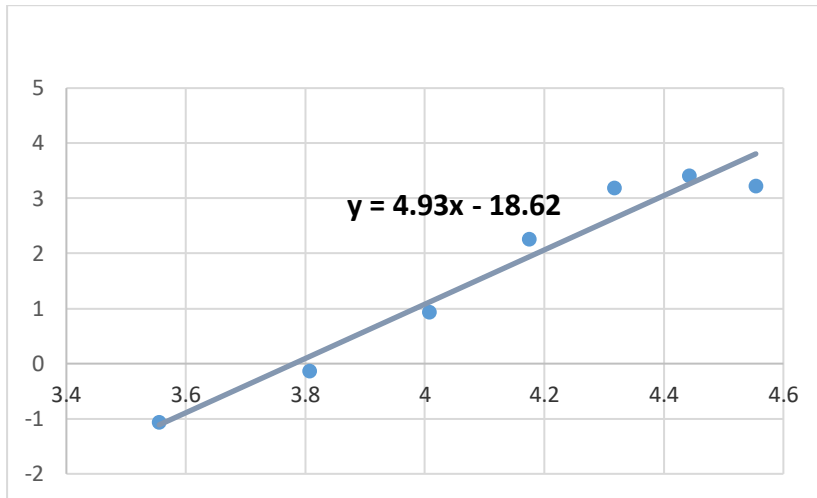

### Figure S4. Spain

Total (males and females combined) for CFR

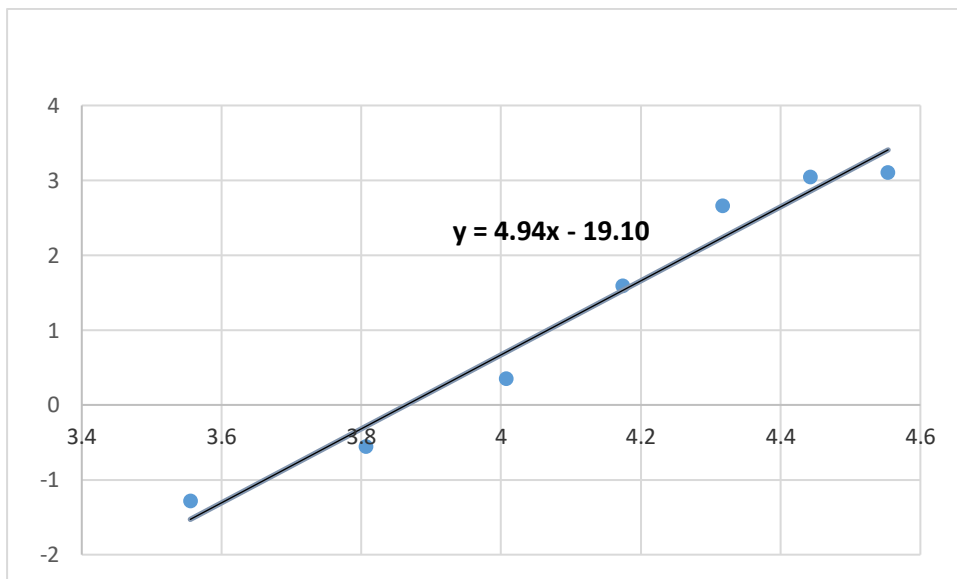

### Figure S5. Japan

Total (males and females combined) for CFR

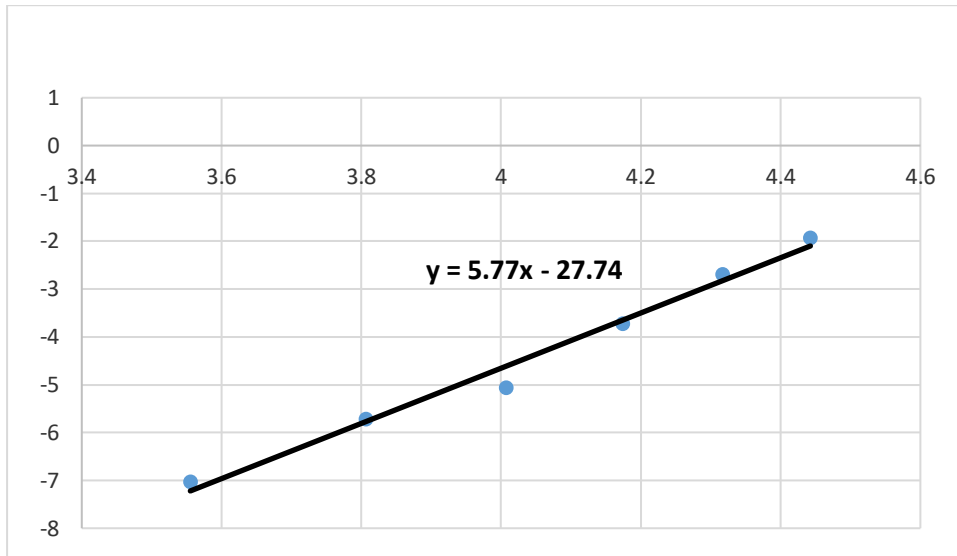

### Figure S6. China

Total (males and females combined) for CFR (using adjusted data)

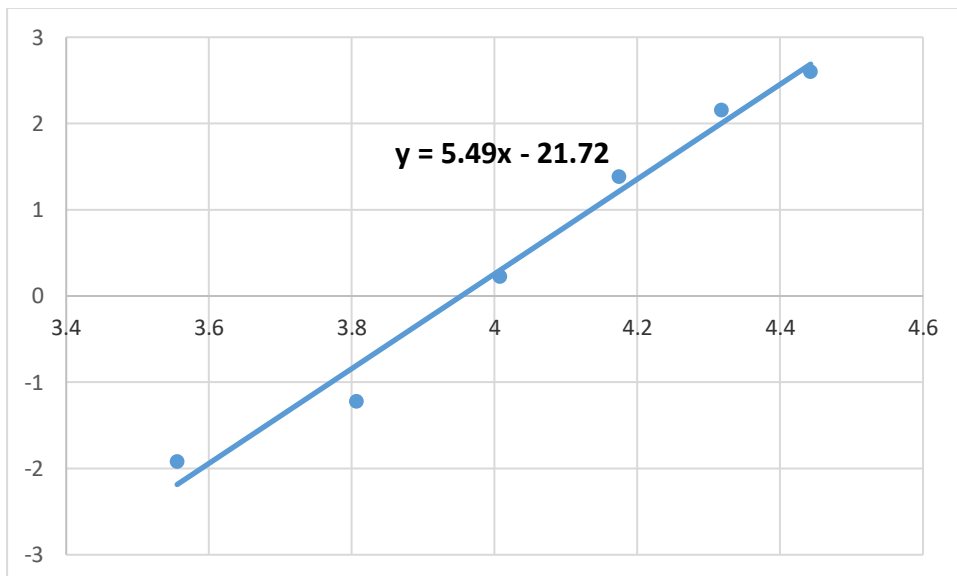

## Figure S7. China

Total (males and females combined) for IFR (using adjusted data)

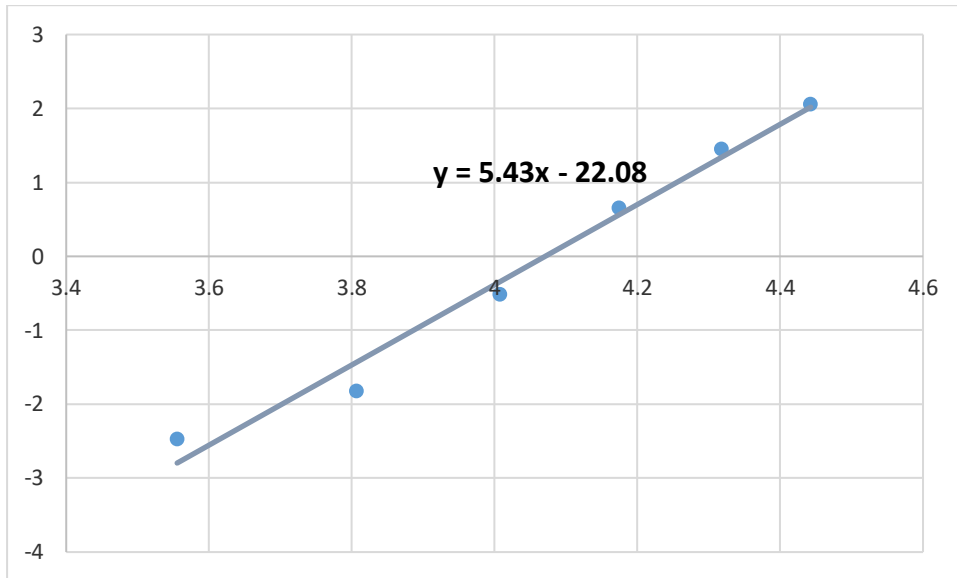

### Analyses for other respiratory diseases

As a comparison, we also obtained similar data for three other respiratory diseases: (seasonal influenza, pandemic influenza and SARS).

#### Seasonal Influenza

In an overview of seasonal influenza for 2017-18 in the US, obtained from the CDC website(1), the age distribution of morbidity and mortality are quite divergent. Illness rates are almost U-shaped, with highest rates amongst the youngest (0-4 years) and middle aged (50-64). Hospitalization is J-shaped with higher hospitalizations amongst the youngest (0-4), lower in youth and young adults, but again high rates amongst middle aged (50-64) and very highest rates amongst the oldest (65+). Mortality increases with age in a pattern that looks almost exponential, from extremely low amongst the youngest and older children, up to very high rates, about 100 times higher among the oldest persons (65+). These patterns are different from those of COVID19, where all three parameters (illness, hospitalization and mortality) seem to be extremely low in children and increase strongly with increasing age. However, because of the relatively low number of deaths in middle-age, most analyses of seasonal influenza mortality are only reported using very broad age-groups, which are unsuitable for the multi-step model. Moreover, almost all reports involve population death rates, not CFRs or IFRs (some publications report CFRs for hospitalised patients, but these

do not represent all cases in the community). Figure S6 shows data adapted from the publication of Cromer et al(2) on seasonal influenza mortality in hospitalised cases in England during January 2000 to August 2007, i.e. during non-pandemic years. The data does not clearly show a log-log pattern, and the fitted slope is only 1.4.

**Figure S8: Log(CFR) vs log(age) in patients hospitalized for non-pandemic influenza in England during 2000-2007**

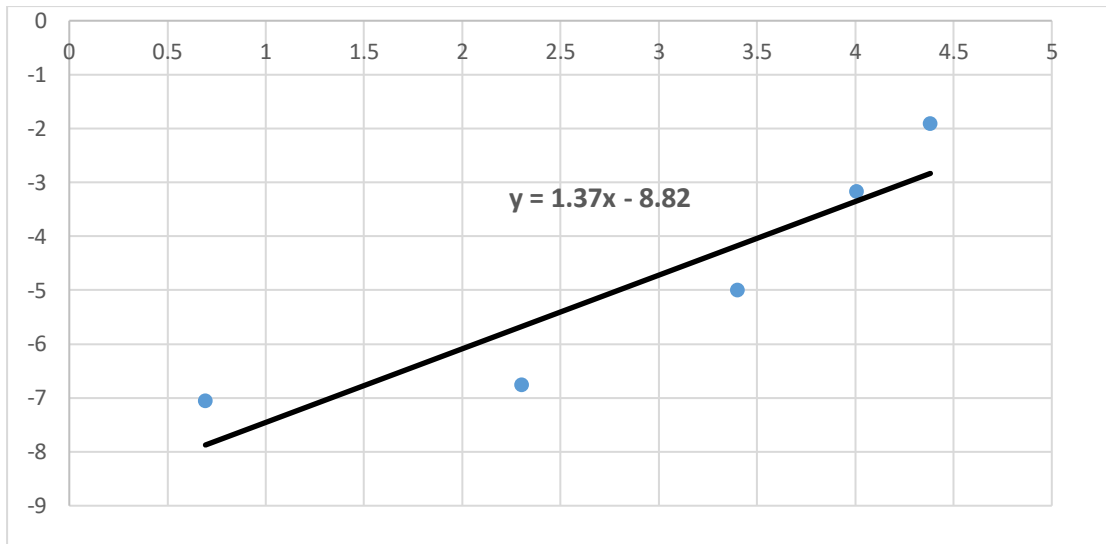

Pandemic influenza:

Different pandemics show different age patterns of mortality, presumably because of different prevalences of cross-immunity (from previous pandemics) at different age-groups. Appendix figure 2 shows data adapted from Mytton et al(3) on mortality due to pandemic (H1N1) 2009 influenza in England. Mortality shows a J-shaped pattern mortality in the youngest age-group. Once again, the data does not clearly show a log-log pattern, and the fitted slope is close to zero.

**Figure S9: Log(CFR) vs log(age) in patients hospitalized for pandemic influenza in England during 2009**

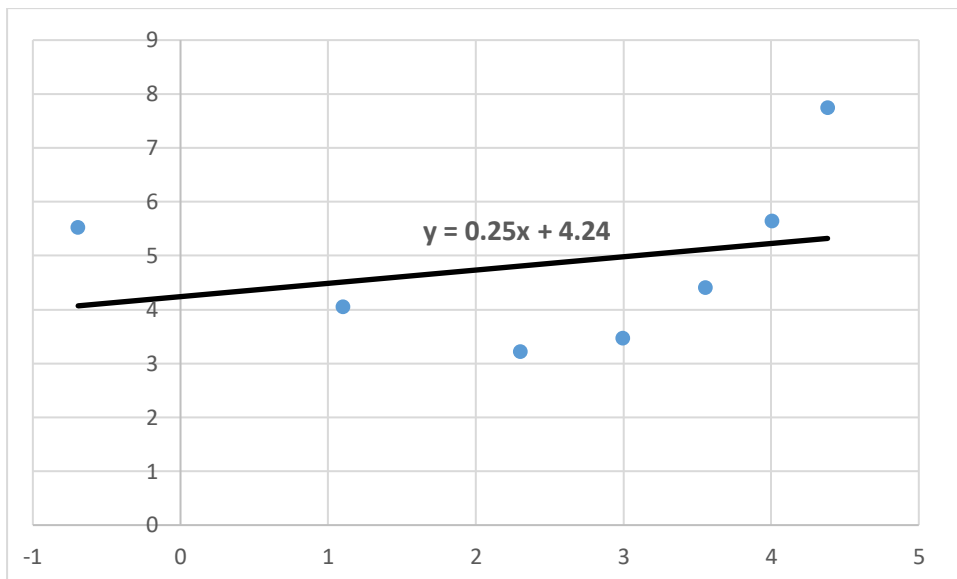

Chowell et al (4) directly contrasted the age-patterns of mortality from pandemic (2009) and non-pandemic (2006-2008) influenza in Mexico. The data are reported as the percentage distribution of deaths across age-groups, rather than as rates. Thus, the multistep model cannot be applied, but the findings are still of interest. They clearly show different age-patterns with non-pandemic influenza deaths following a classic J-shape (high mortality age 0-4 years, then low mortality slowly rising throughout the age-range); pandemic mortality involved a relatively larger number of deaths during middle-age.

#### Severe acute respiratory syndrome (SARS)

We obtained SARS mortality data from the publication of Chan-Yeung and Rui-Heng (5) who analyzed data from 298 deaths in Hong Kong up until 1<sup>st</sup> July 2003. The overall CFR was 17%, but this increased approximately exponentially by age. The SARS CFR had an approximately log-log relationship with age, similar to that observed for COVID-19, but with a smaller slope (3.6). The slope on males (3.4) was 0.4 lower than the slope in females (3.8), similar to the pattern observed for COVID-19. Thus, the pattern for SARS was similar to that for SARS-COV-2, but with a lower slope. This is perhaps not surprising as both are coronaviruses. One can only speculate as to why SARS may have a lower slope, but it should perhaps be noted that SARS is a much more aggressive virus, with higher death rates than SARS-COV-2 at each age-group.

**Figure S10. Ln(CFR) versus ln(age) for SARS mortality data in Hong Kong up until 1<sup>st</sup> July 2003**

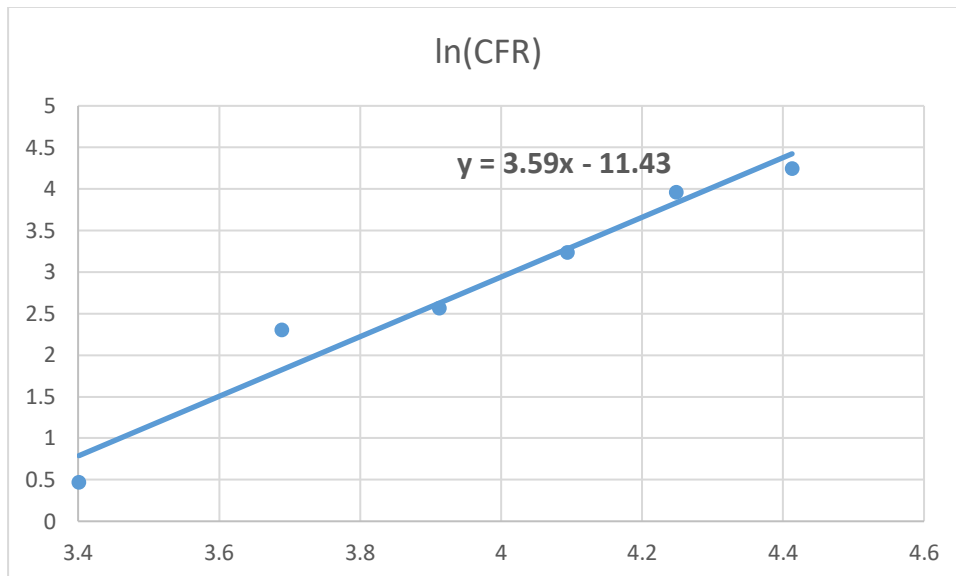

## References

1. CDC. Estimated Influenza Illnesses, Medical visits, Hospitalizations, and Deaths in the United States — 2017–2018 influenza season Atlanta, GA: CDC; 2020 [31 May 2020]. Available from: <https://www.cdc.gov/flu/about/burden/2017-2018.htm>.
2. Cromer D, van Hoek AJ, Jit M, Edmunds WJ, Fleming D, Miller E. The burden of influenza in England by age and clinical risk group: a statistical analysis to inform vaccine policy. *Journal of Infection*. 2014;68:363-71.
3. Mytton OT, Rutter D, Make M, Mak M, Stanton EAI, Sachedina N, et al. Mortality due to pandemic (H1N1) 2009 influenza in England: a comparison of the first and second waves. 140. 2012:1533-41.
4. Chowell G, Bertozzi SM, Colchero MA, Lopez-Gatell H, Alpuche-Aranda C, Hernandez M, et al. Severe respiratory disease concurrent with the circulation of H1N1 influenza. *New England Journal of Medicine*. 2009;361:674-97.
5. Chan-Yeung M, Rui-Heng R. SARS: epidemiology. *Respirology*. 2003;8:S9-S14.
